# Supplementary material for: Metagenomes Reveal Global Distribution of Bacterial Steroid Catabolism in Natural, Engineered, and Host Environments
Source: PubMed Central journal article supplement (PMC5790920; doi:10.1128/mbio.02345-17), 2018-01-30
Supplement: mbo001183694sf1.pdf [file mbo001183694sf1.pdf]

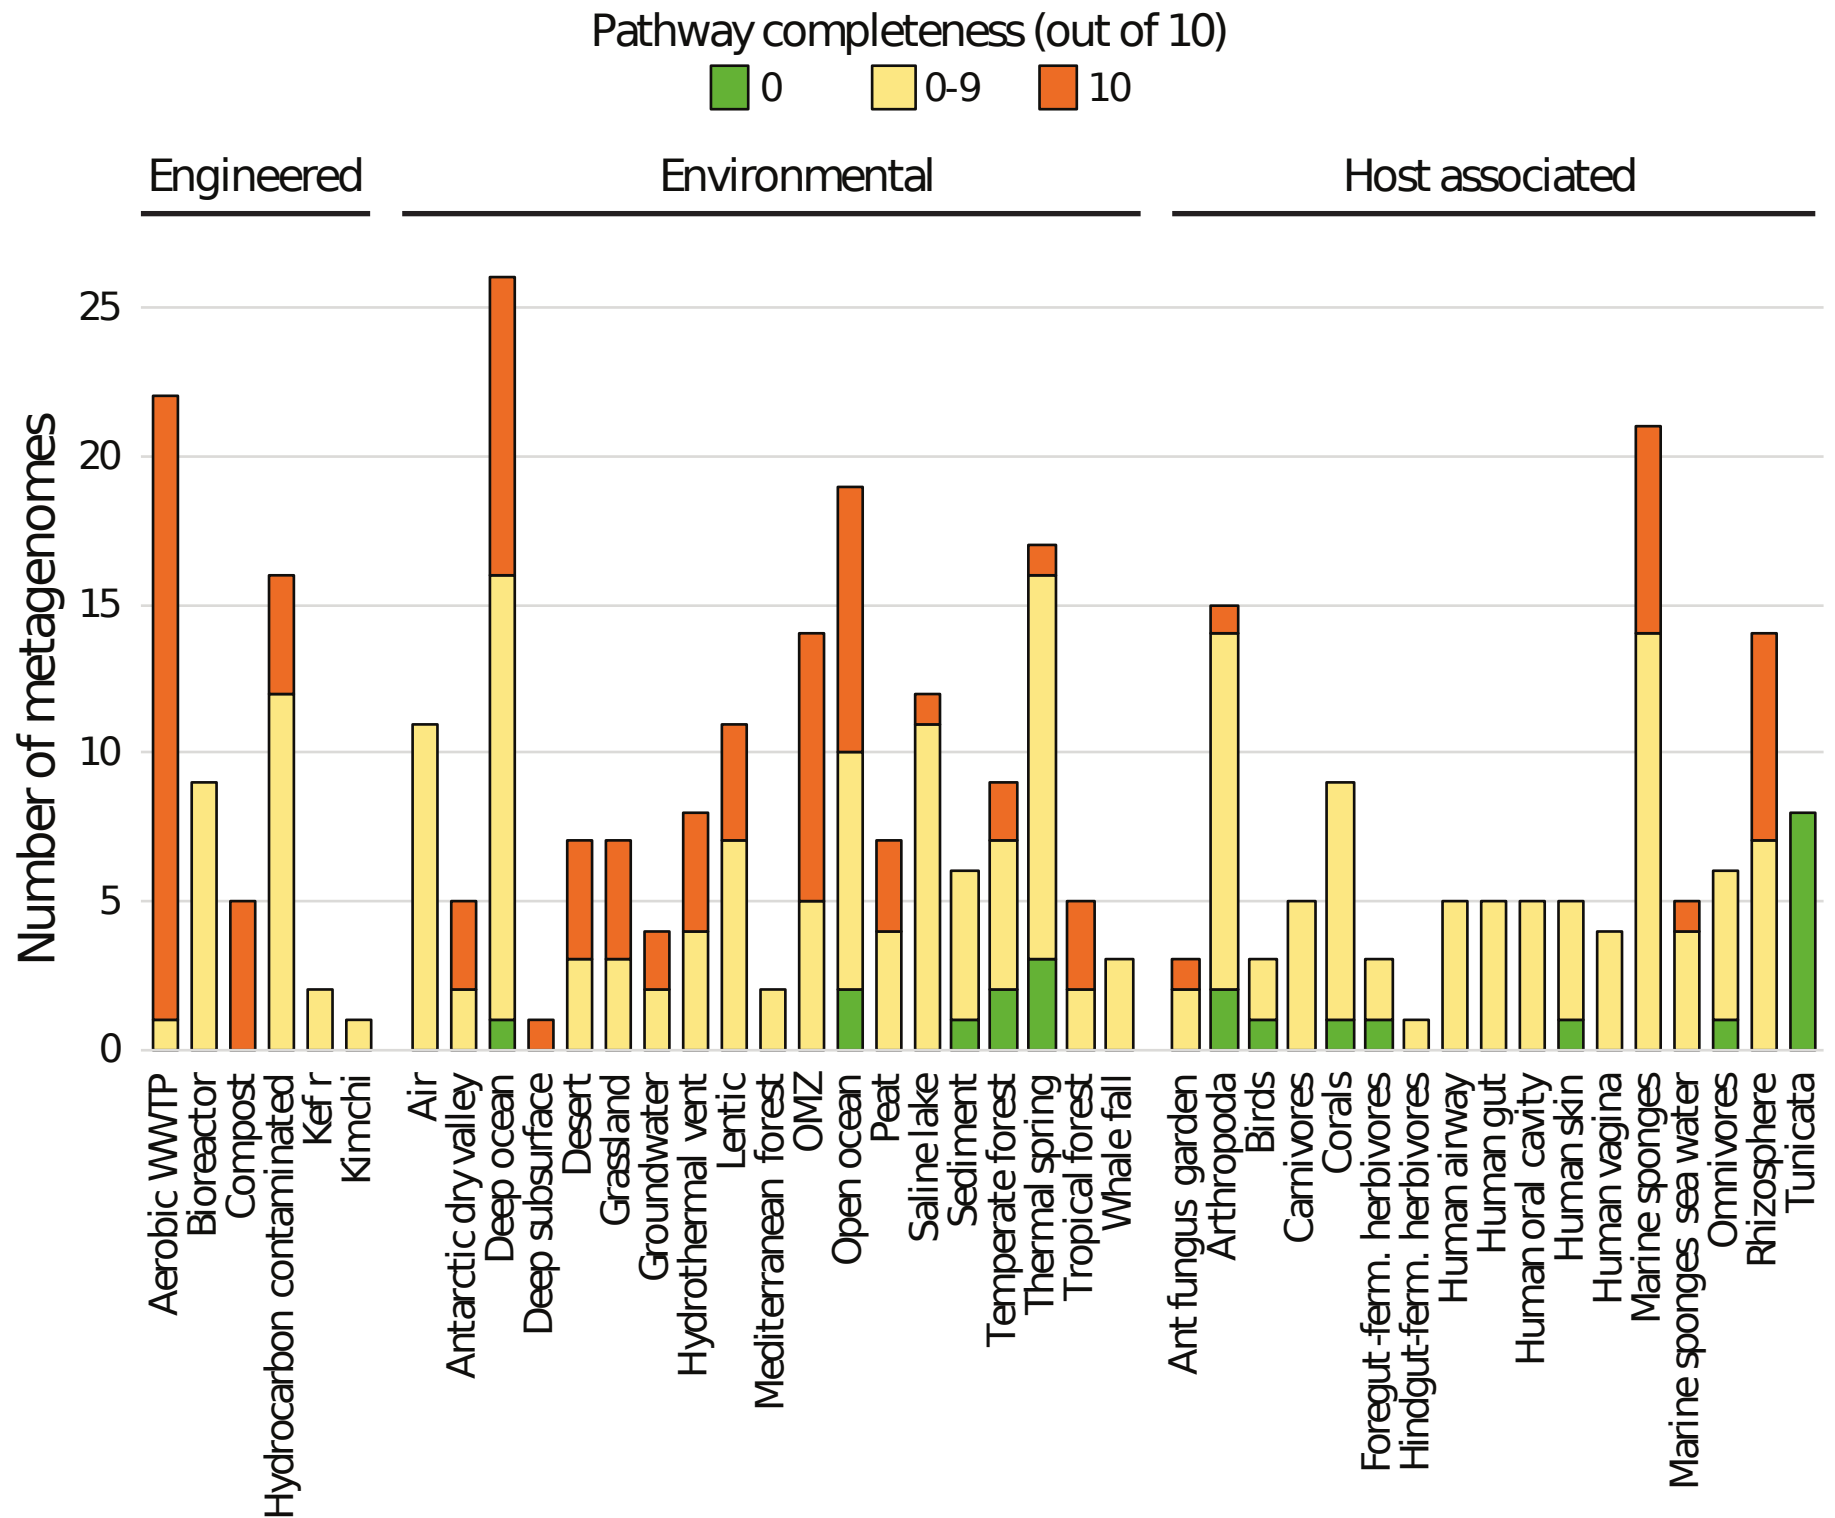

**Fig. S1:** Number of steroid-degradation protein families (out of ten) identified in 346 metagenomes by HMM analysis. Only metagenomes containing genes for all ten protein families were further analyzed.
