# Supplementary material for: Metagenomes Reveal Global Distribution of Bacterial Steroid Catabolism in Natural, Engineered, and Host Environments
Source: PubMed Central journal article supplement (PMC5790920; doi:10.1128/mbio.02345-17), 2018-01-30
Supplement: mbo001183694sf2.pdf [file mbo001183694sf2.pdf]

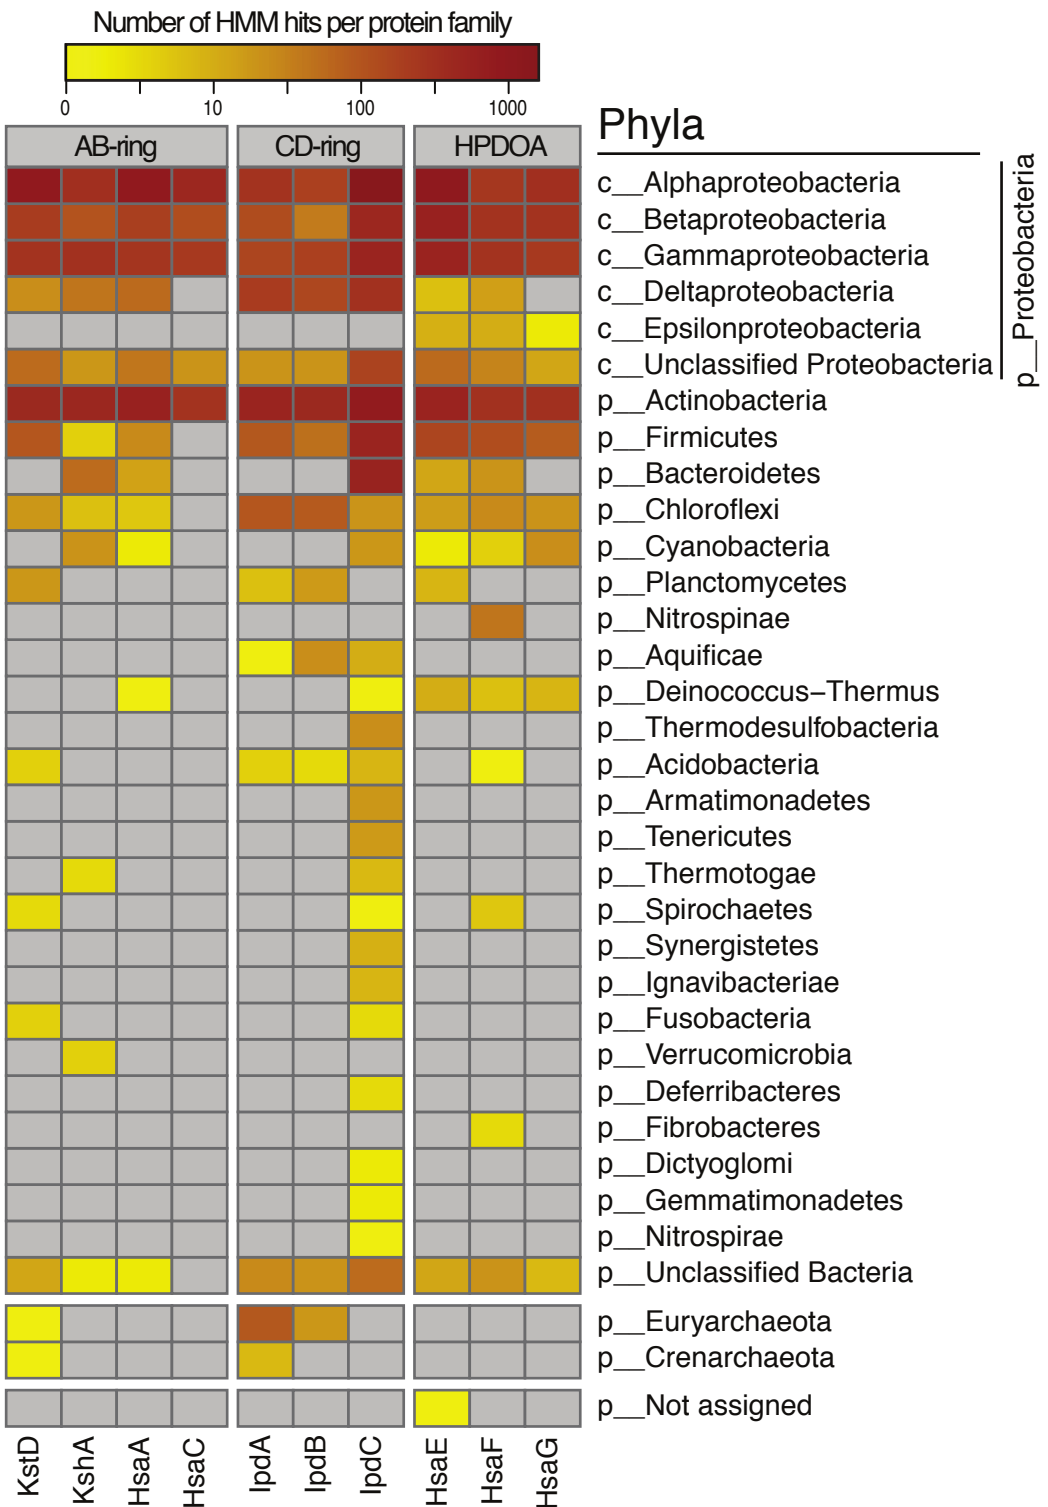

**Fig. S2:** Number of HMM hits assigned to bacterial and archaeal phyla for each of ten steroid-degradation protein families analyzed.
