# Supplementary material for: Metagenomes Reveal Global Distribution of Bacterial Steroid Catabolism in Natural, Engineered, and Host Environments
Source: PubMed Central journal article supplement (PMC5790920; doi:10.1128/mbio.02345-17), 2018-01-30
Supplement: mbo001183694sf3.pdf [file mbo001183694sf3.pdf]

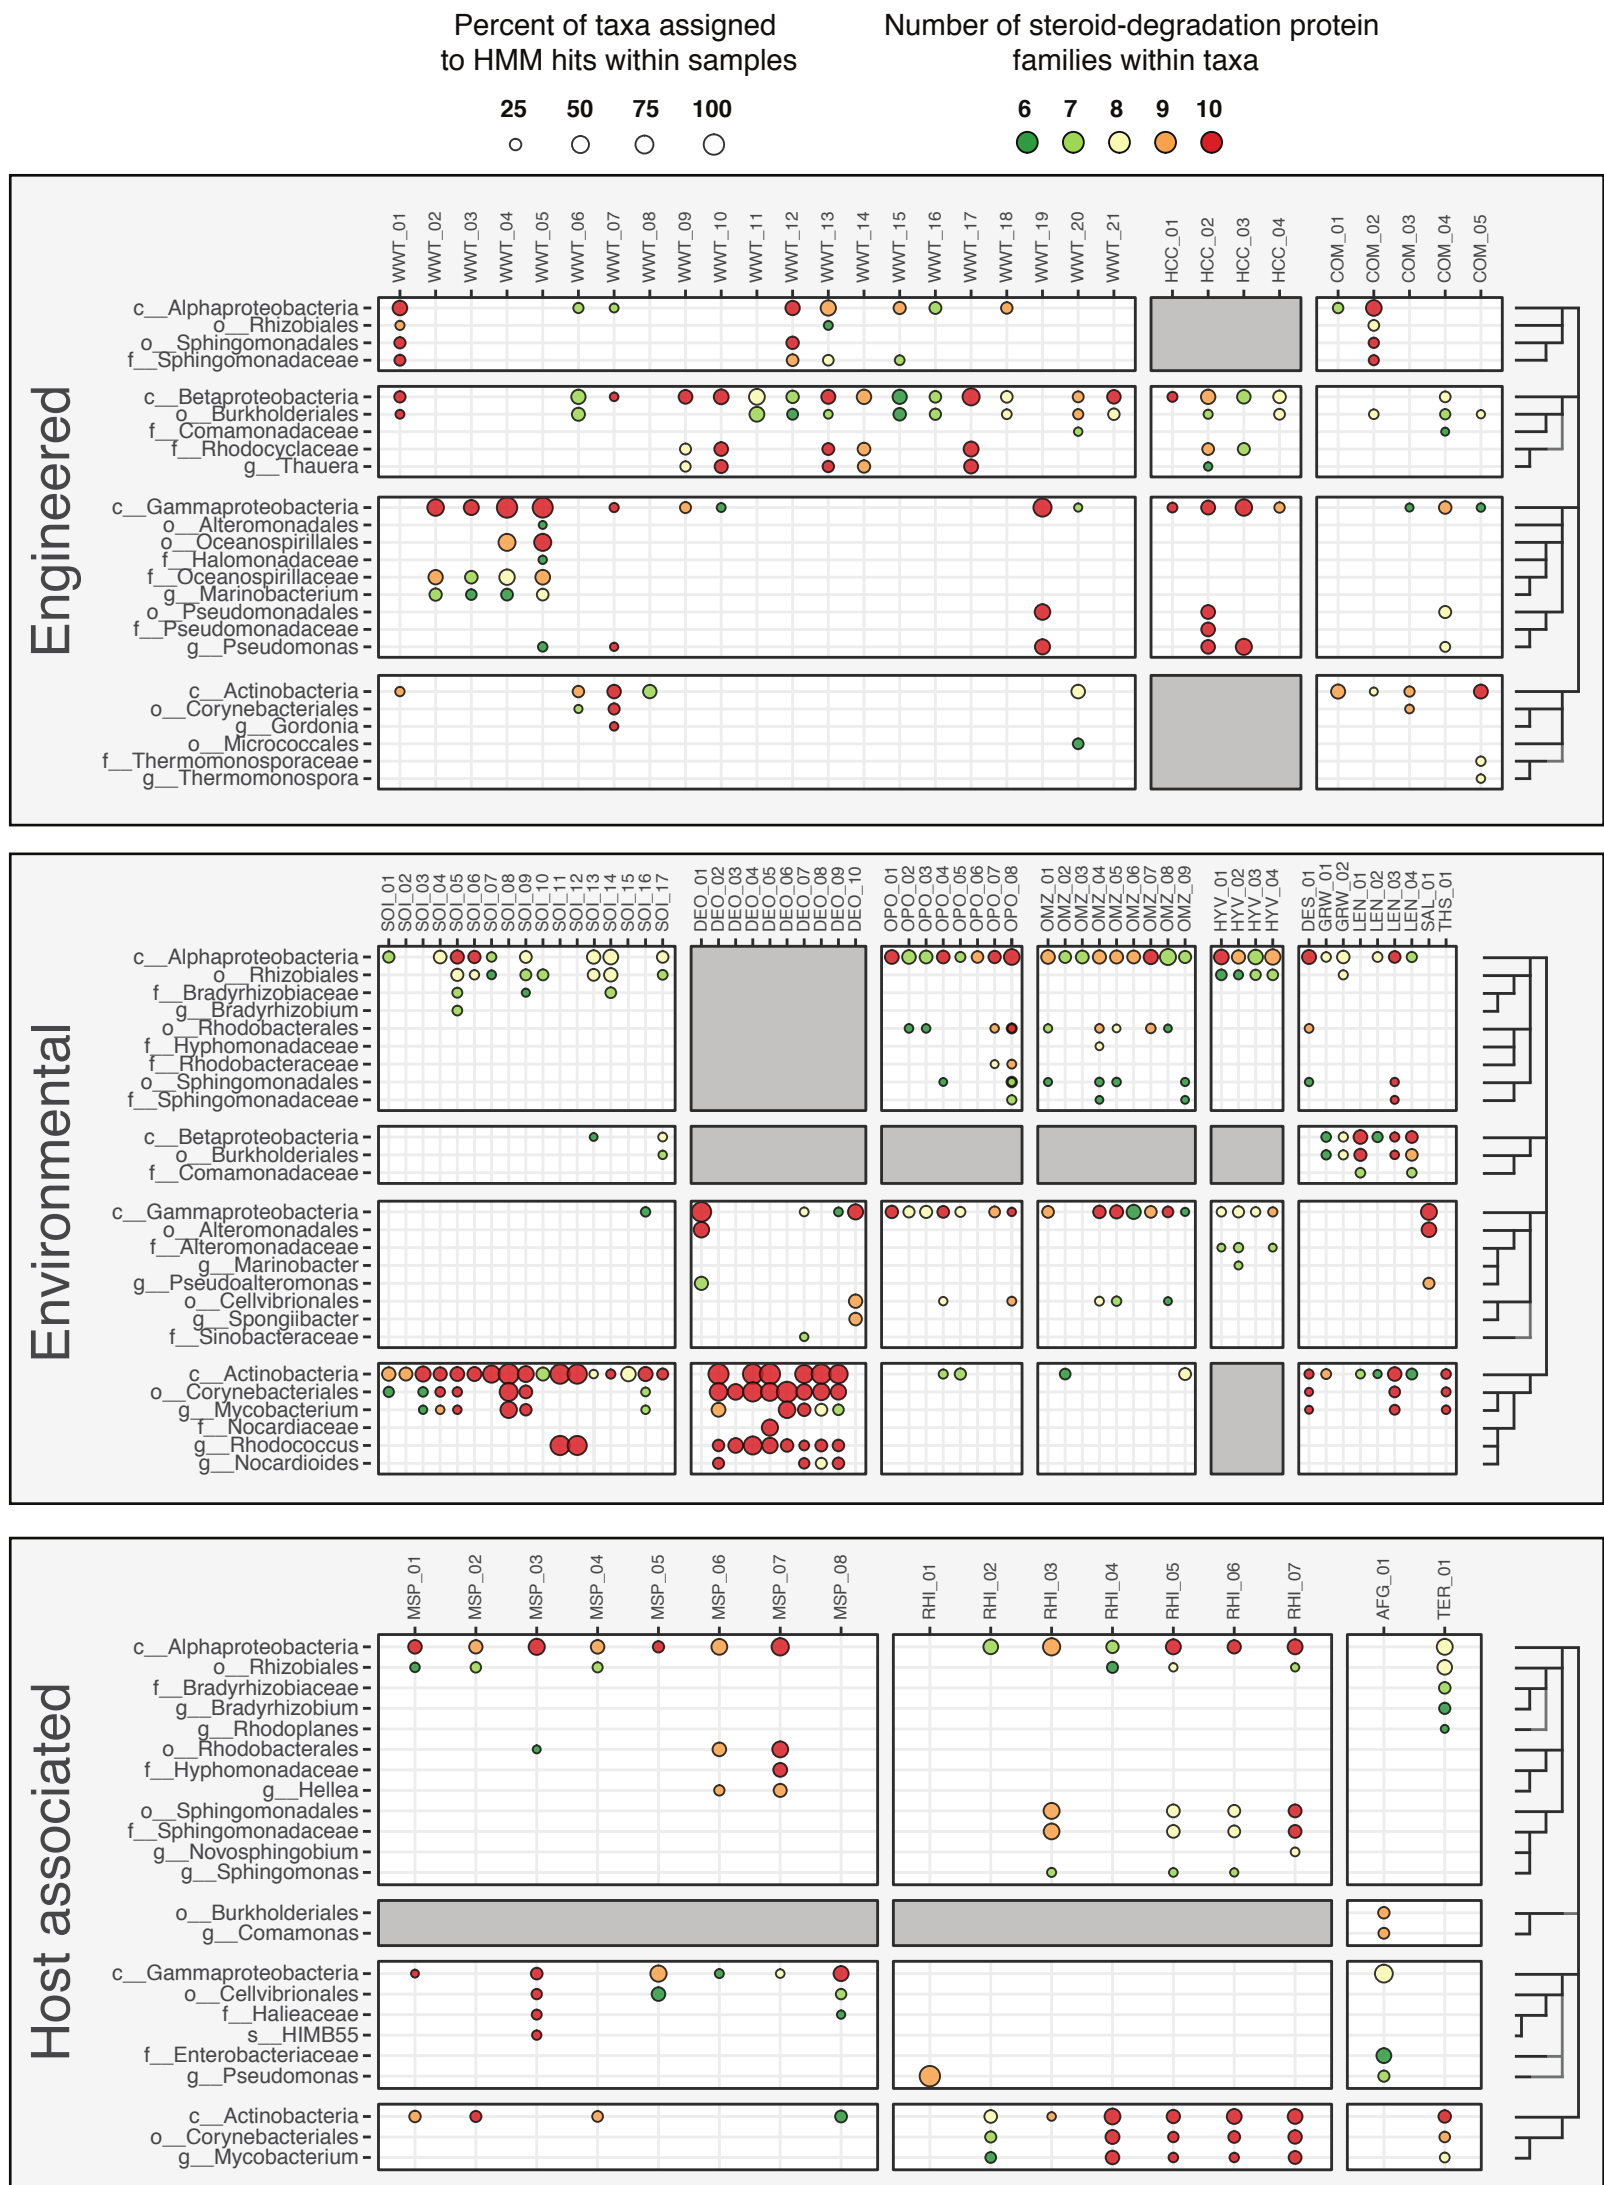

**Fig. S3:** Lowest common ancestor analysis of steroid-degradation HMM hits. Only taxa are shown that were assigned to more than 10% of HMM hits within a metagenome sample and to more than five out of ten steroid-degradation protein families. Percent of HMM hits within a metagenome sample are represented by circle size and the number of steroid-degradation protein families per taxa are colour coded. Only the lowest taxonomic rank is shown in cases where higher ranks had identical percentage and pathway completeness values.
