# Supplementary material for: Metagenomes Reveal Global Distribution of Bacterial Steroid Catabolism in Natural, Engineered, and Host Environments
Source: PubMed Central journal article supplement (PMC5790920; doi:10.1128/mbio.02345-17), 2018-01-30
Supplement: mbo001183694sf4a.pdf [file mbo001183694sf4a.pdf]

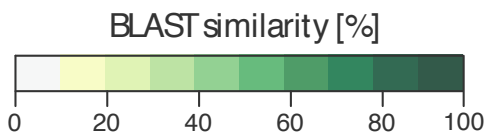

## *Pseudomonas* sp. Chol1 steroid degradation proteins

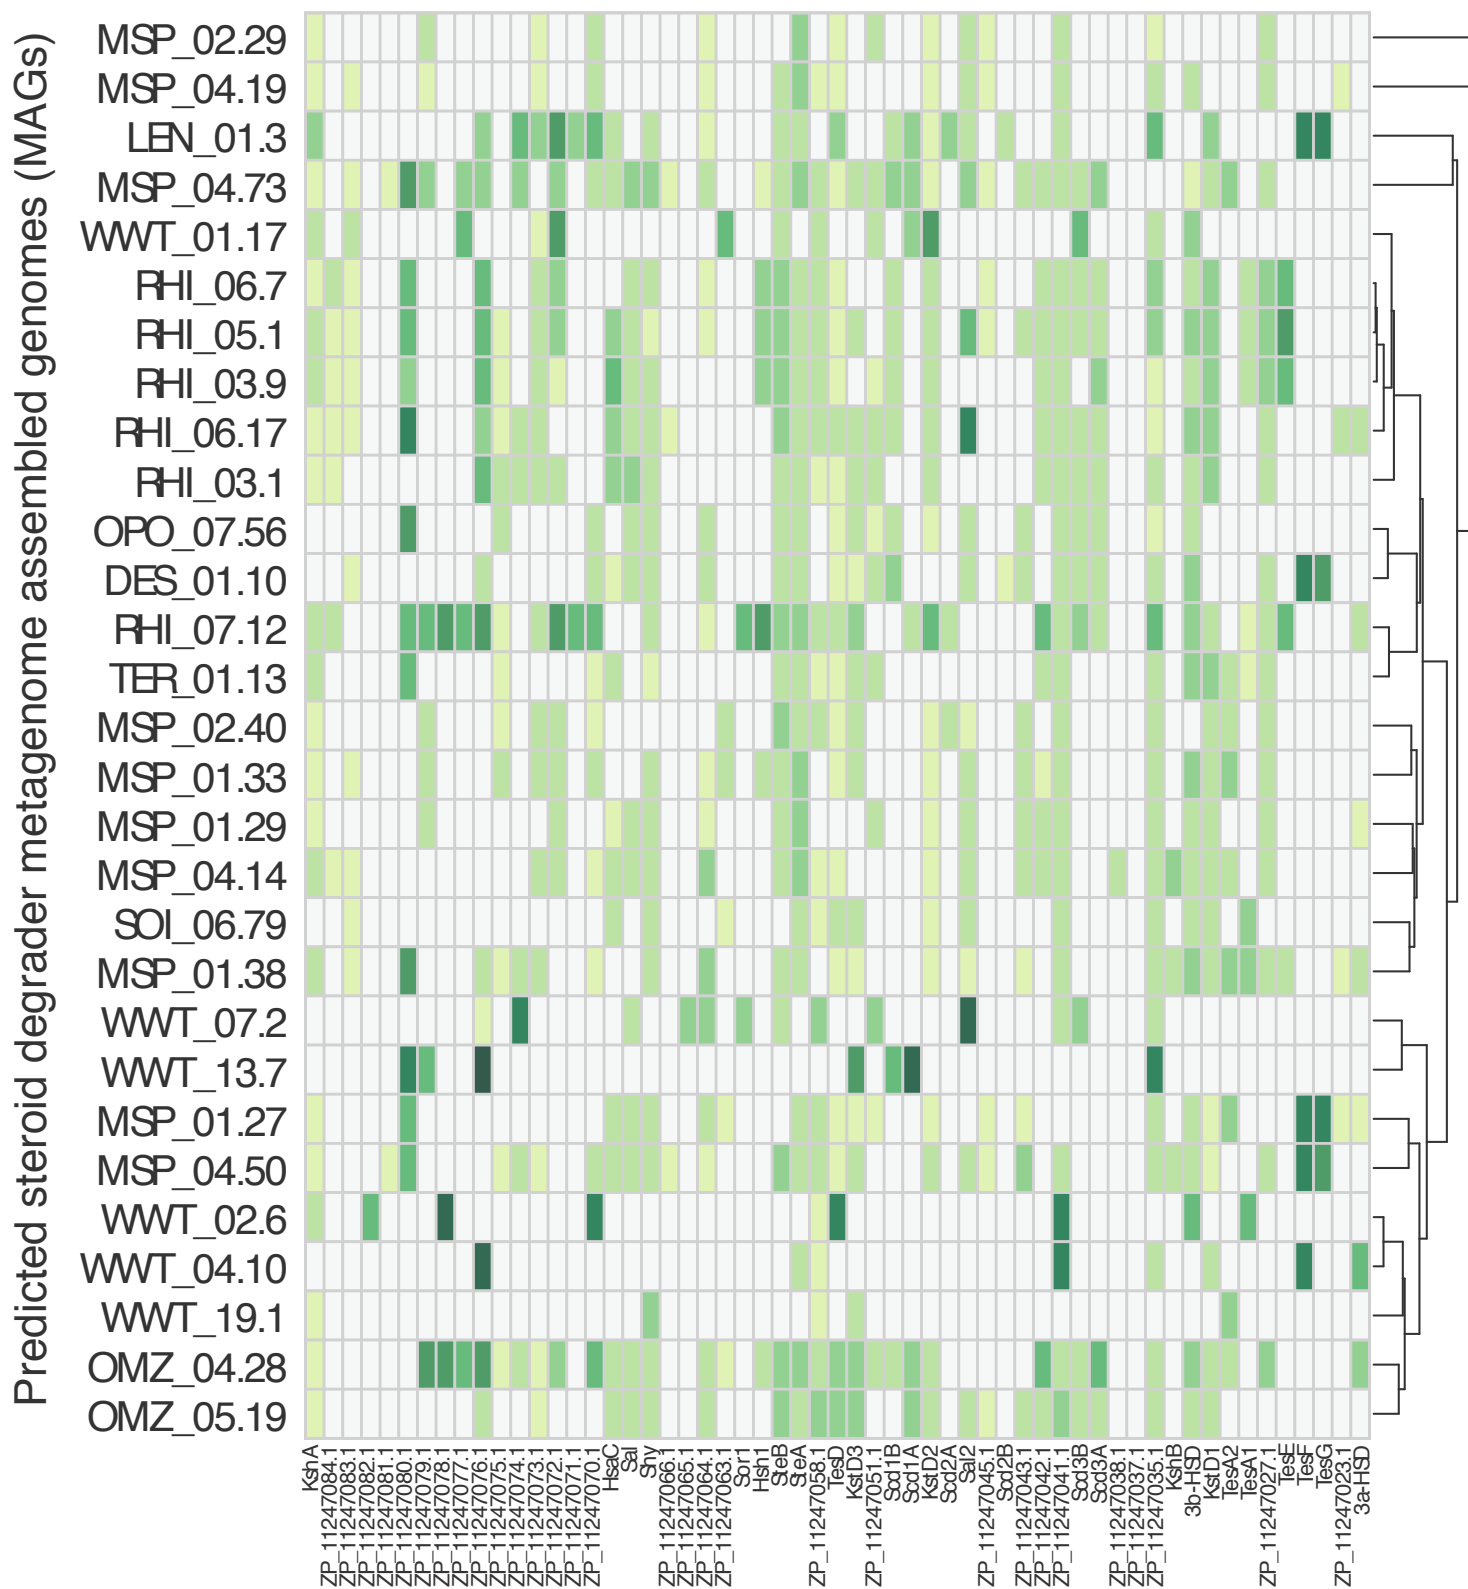

**Fig. S4A Page 1:** Heatmap showing BLAST identity for best reciprocal BLASTp hits for proteobacterial and bacterial MAGs compared to steroid-degradation proteins from *Pseudomonas* sp. strain Chol1.

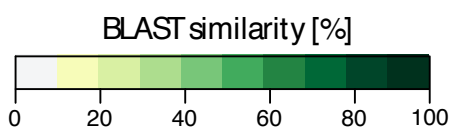

## *Comamonastestosteroni* CNB-2 steroid degradation proteins

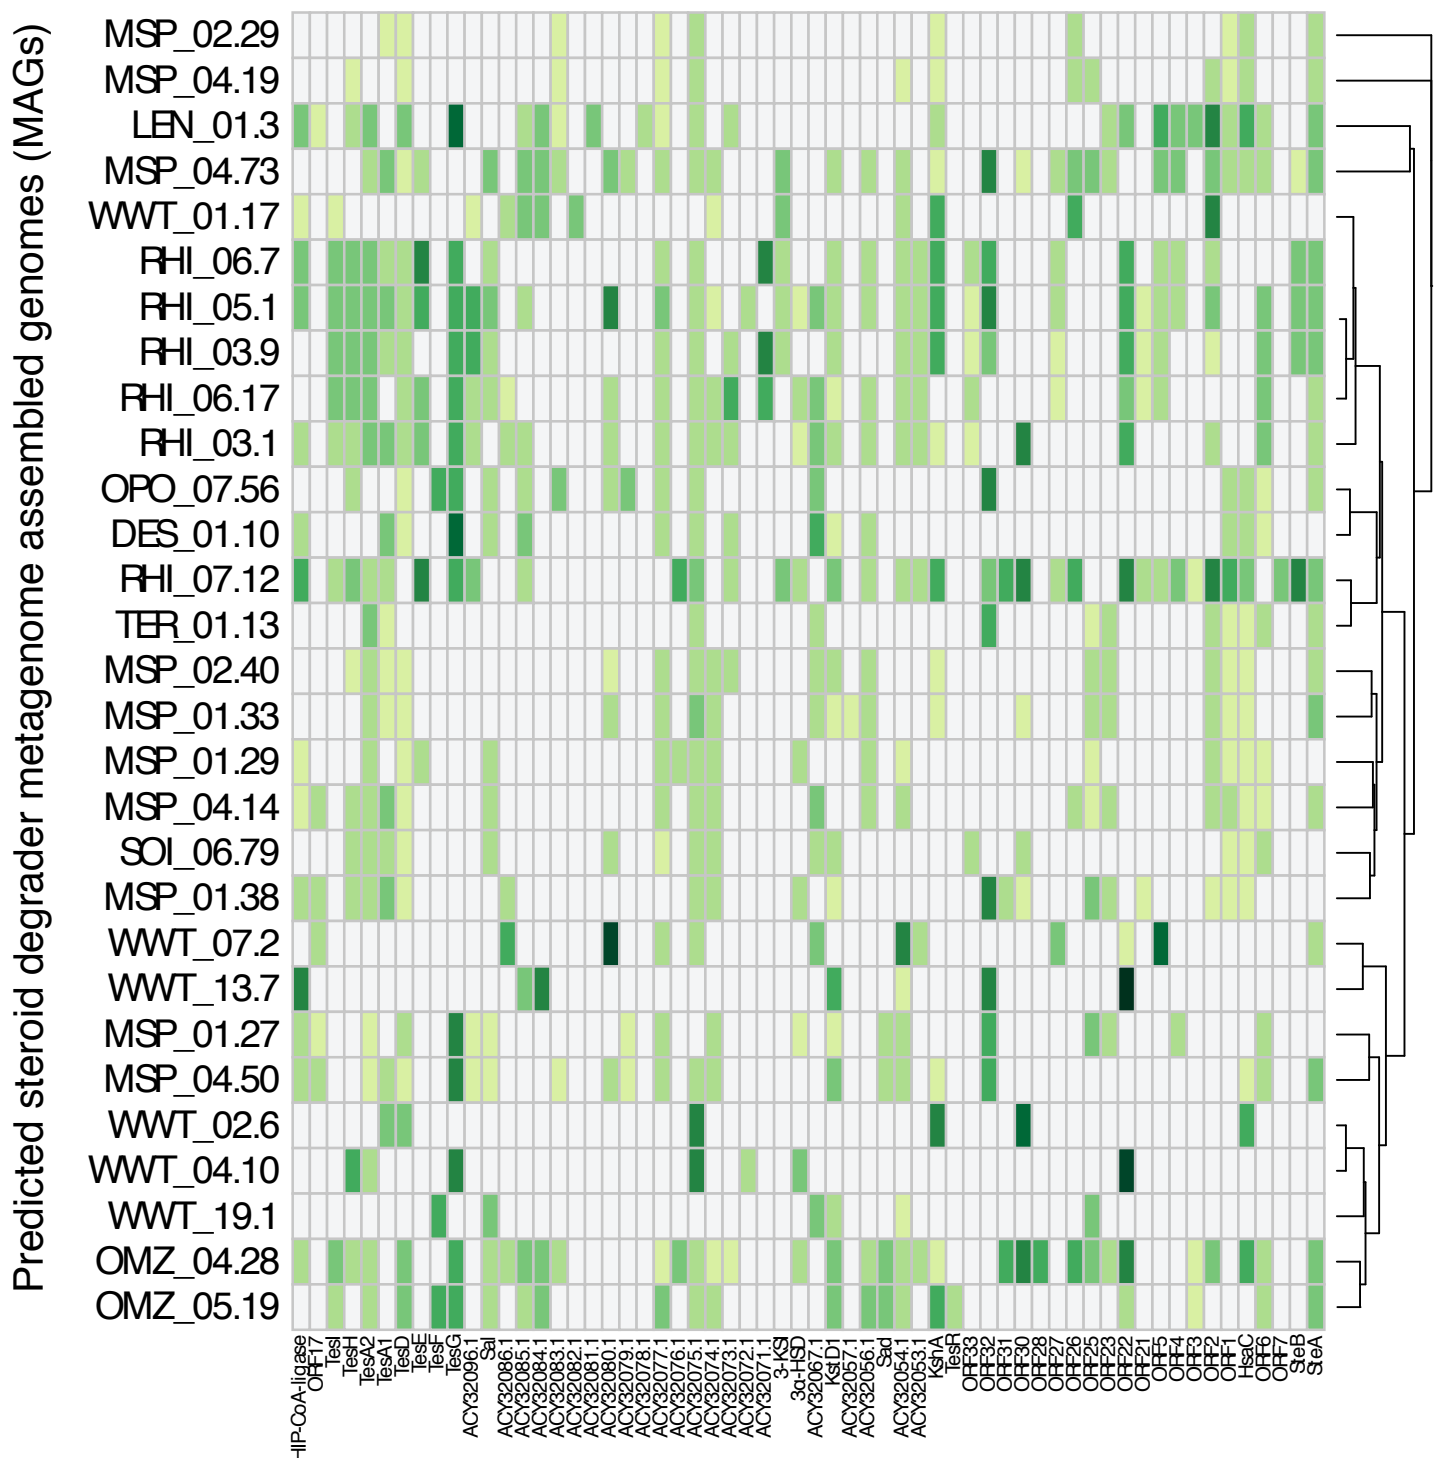

**Fig. S4A: Page 2:** Heatmap showing BLAST identity for best reciprocal BLASTp hits for proteobacterial and bacterial MAGs compared to steroid-degradation proteins from *Comamonastestosteroni* CNB-2.

*Pseudoalteromonas haloplanktis* TAC15  
steroid degradation proteins

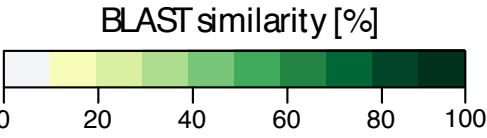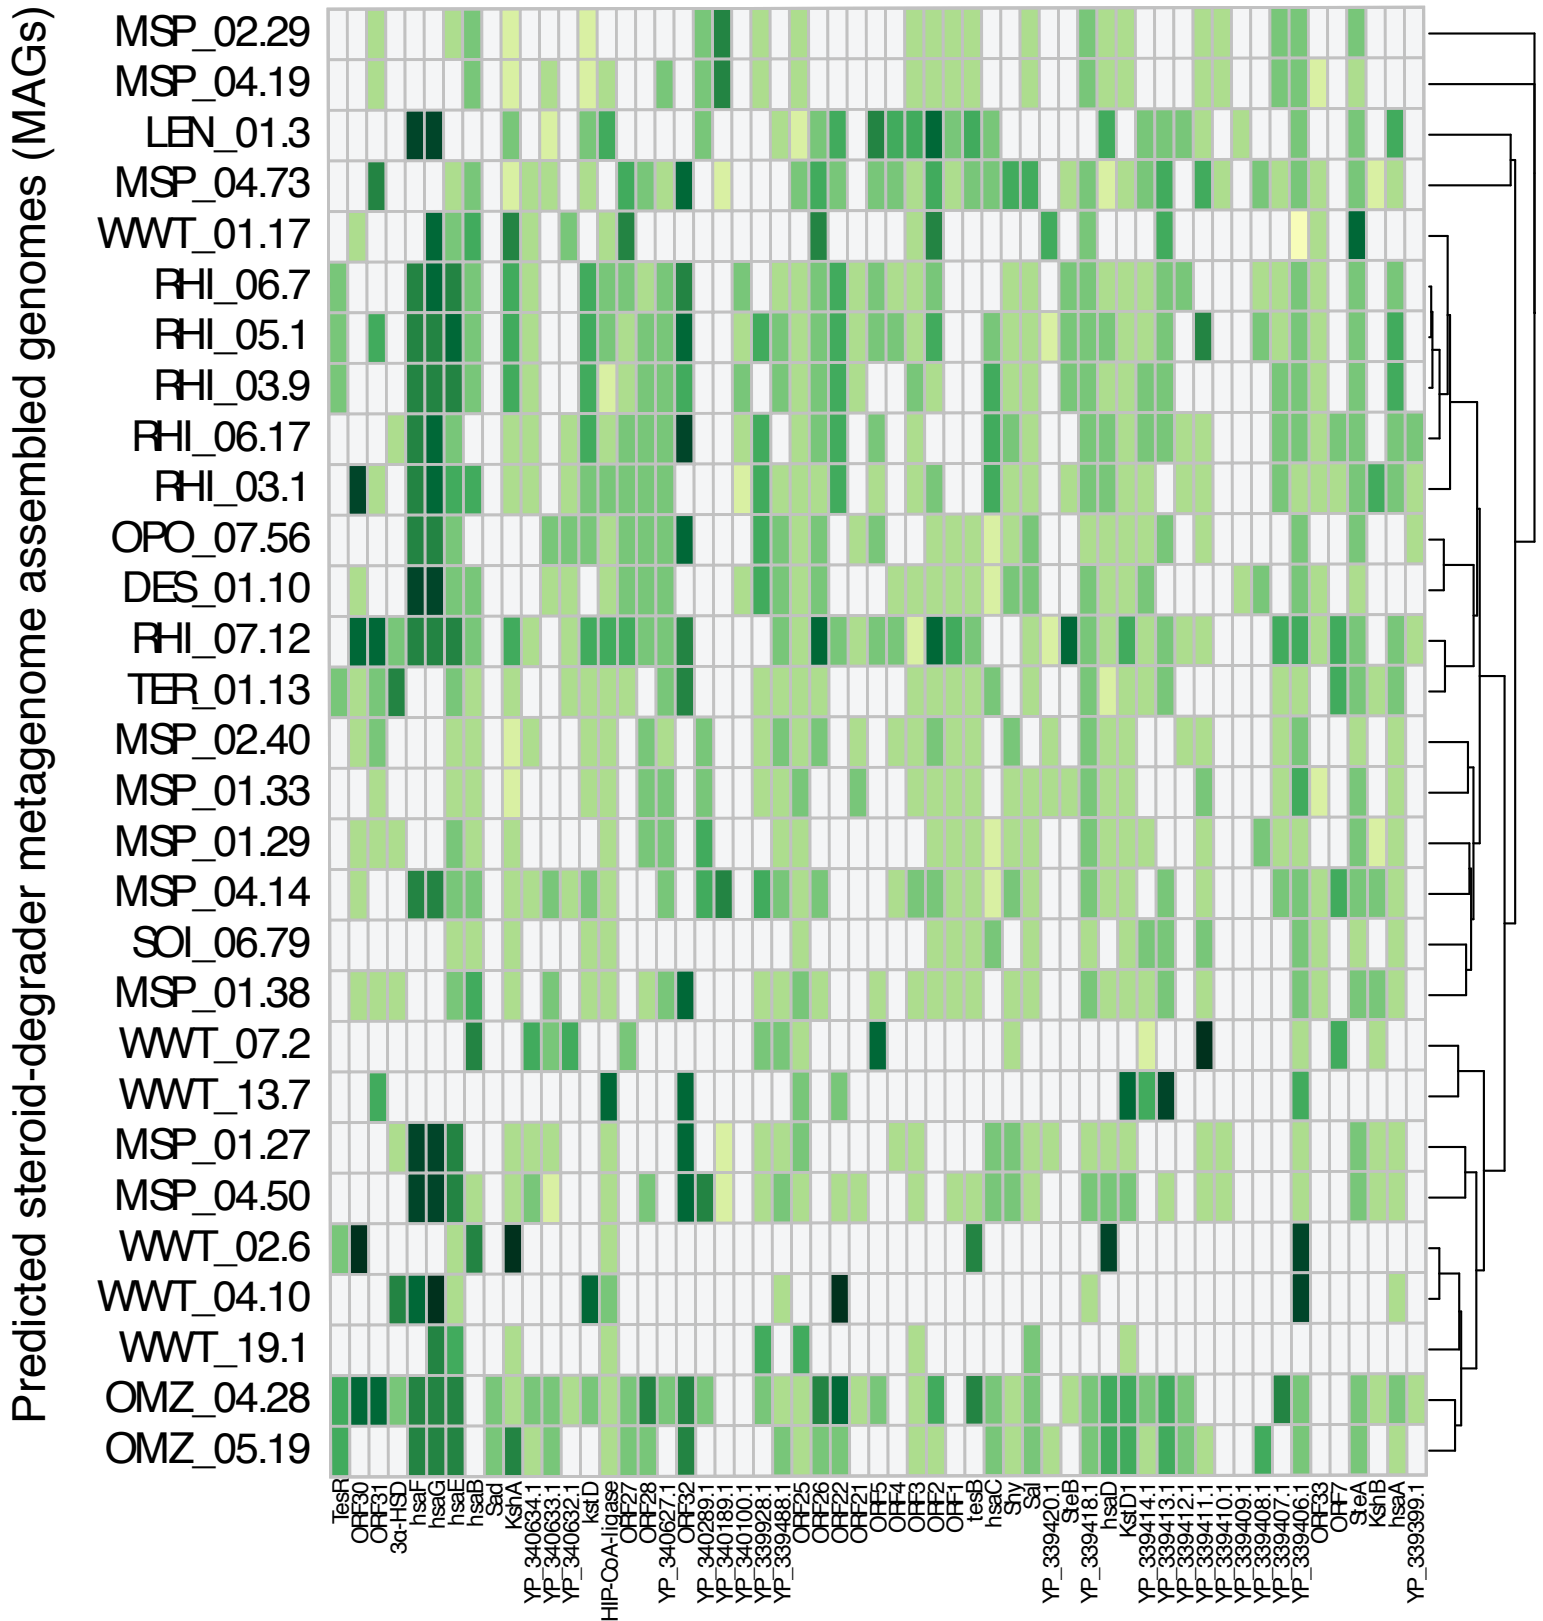

**Fig. S4A: Page 3** Heatmap showing BLAST identity for best reciprocal BLASTp hits for proteobacterial and bacterial MAGs compared to steroid-degradation proteins from *Pseudoalteromonas haloplanktis* TAC125.
