# Supplementary material for: Metagenomes Reveal Global Distribution of Bacterial Steroid Catabolism in Natural, Engineered, and Host Environments
Source: PubMed Central journal article supplement (PMC5790920; doi:10.1128/mbio.02345-17), 2018-01-30
Supplement: mbo001183694sf4b.pdf [file mbo001183694sf4b.pdf]

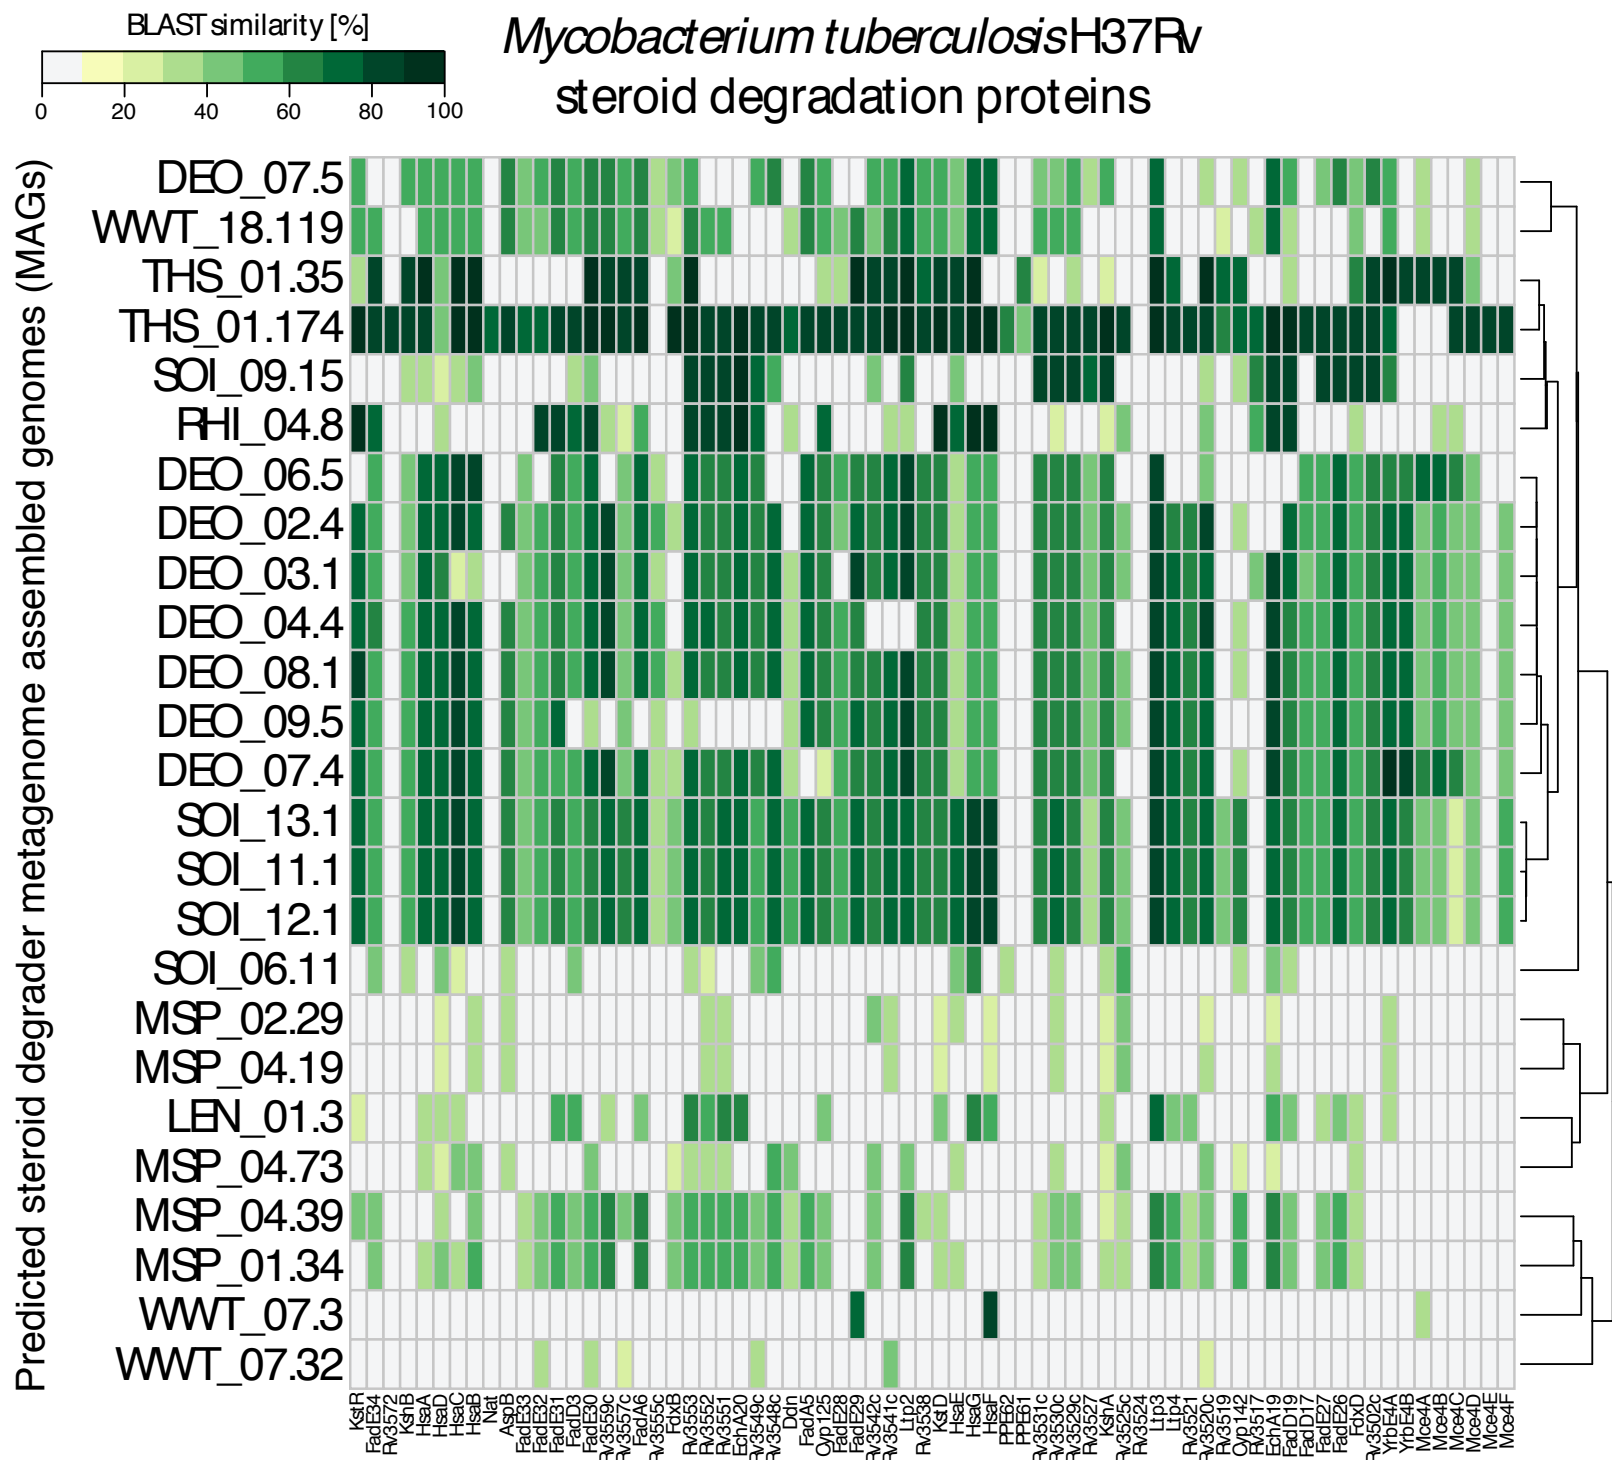

**Fig. S4B Page 1:** Heatmap showing BLAST identity for best reciprocal BLASTp hits for actinobacterial and bacterial MAGs compared to steroid-degradation proteins from *Mycobacterium tuberculosis* H37Rv.

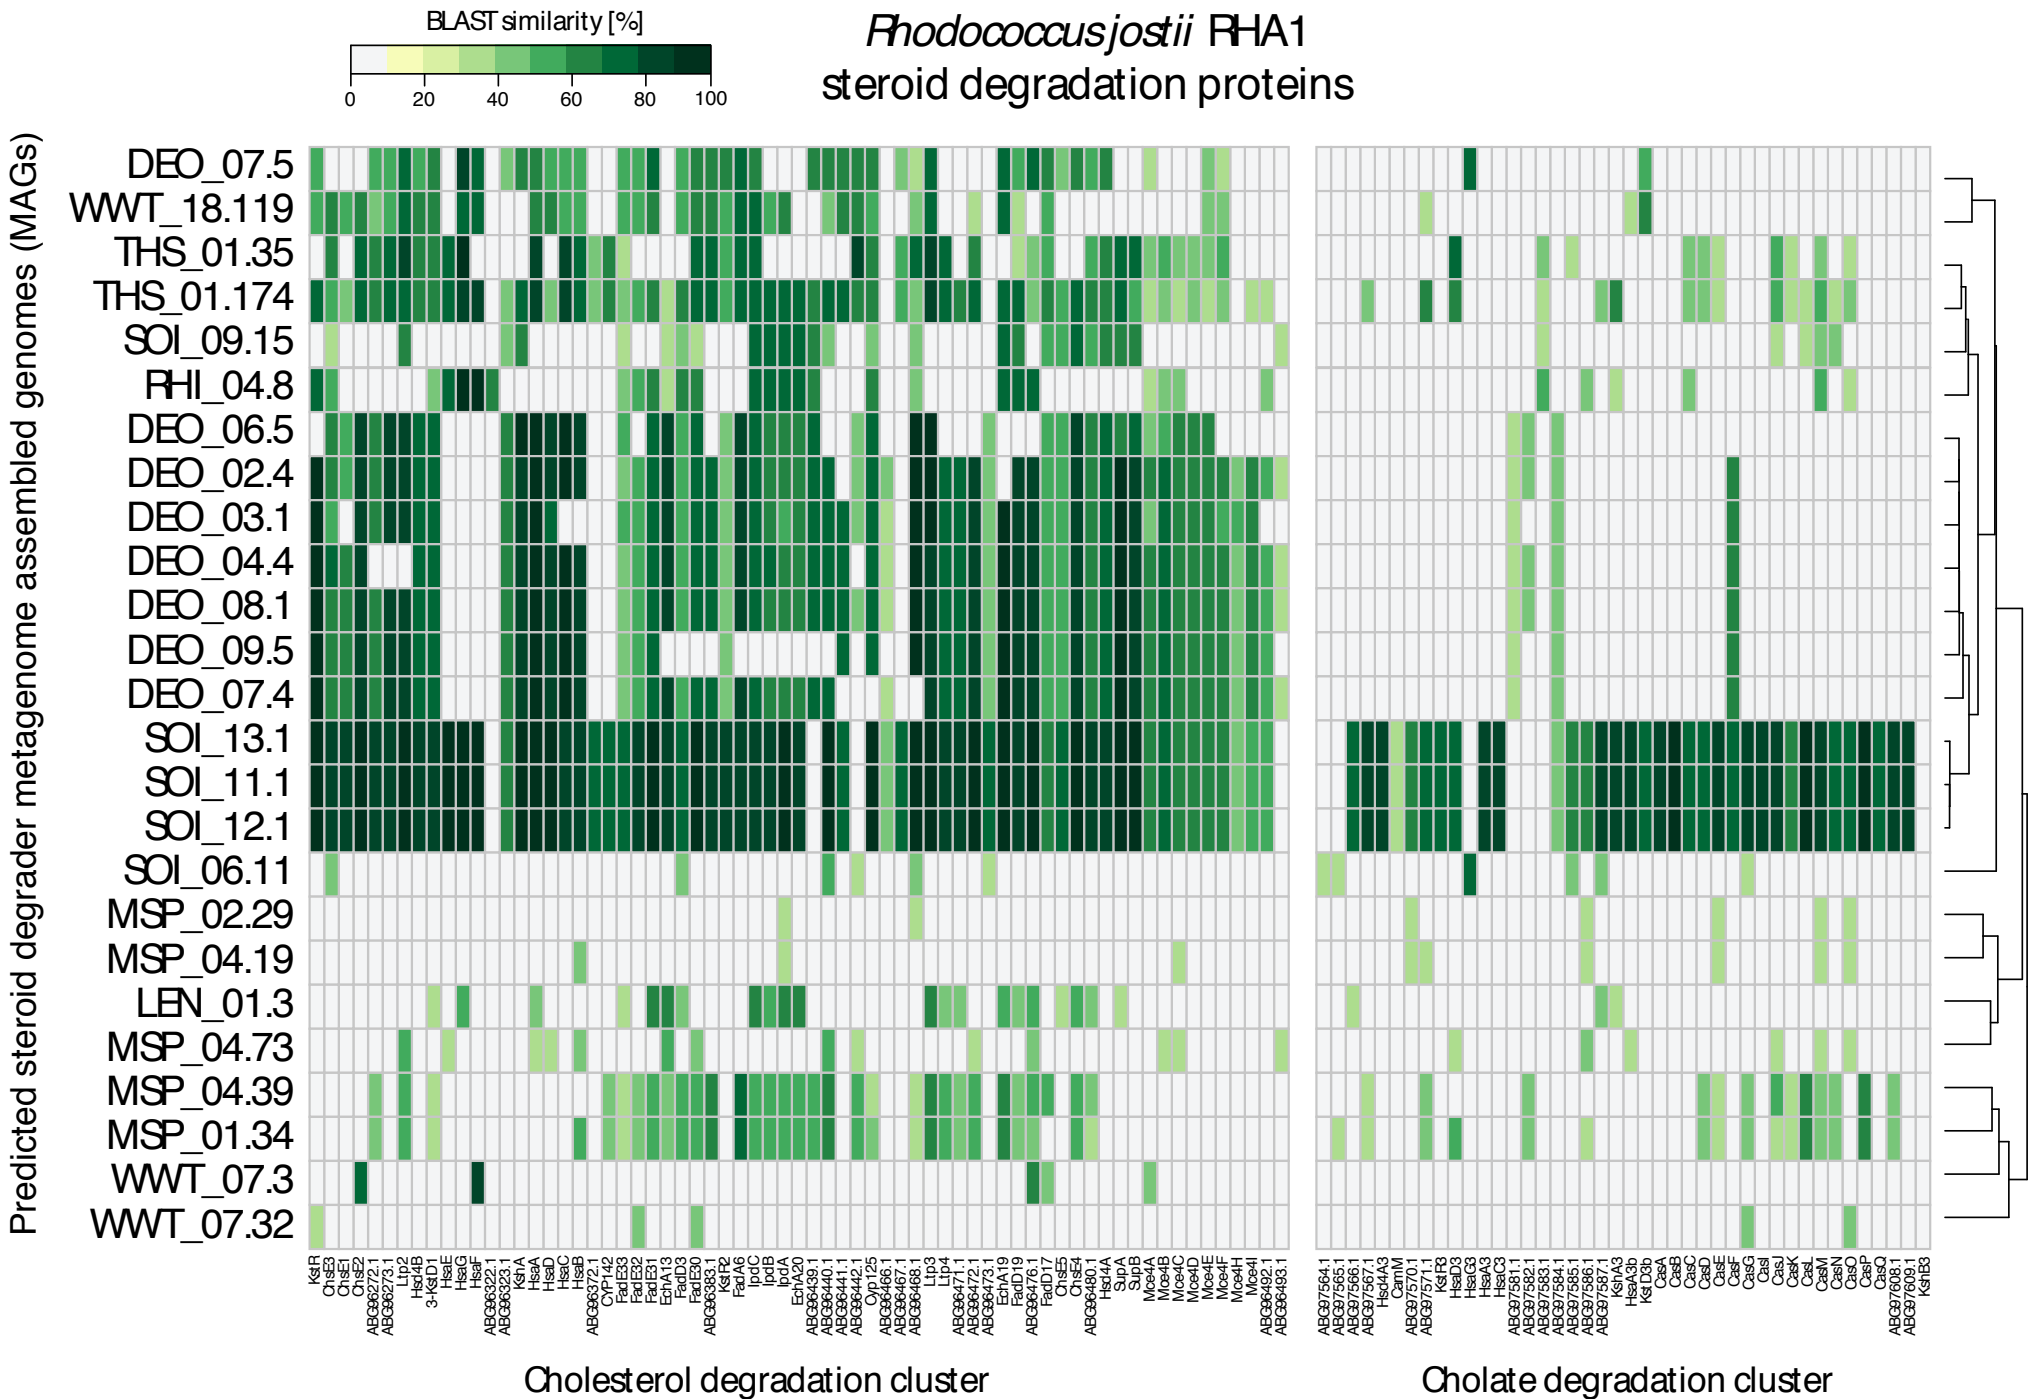

**Fig. S4B Page 2:** Heatmap showing BLAST identity for best reciprocal BLASTp hits for actinobacterial and bacterial MAGs compared to steroid-degradation proteins from *Rhodococcus jostii* RHA1
